# Supplementary material
Source: Research Square preprint supplement (doi:10.21203/rs.3.rs-9070647/v1)
Supplement: Supplementary file 1 [file db475abac23d704f55481fc9.docx]

Table A1. Subgroup analysis of the association between hypothyroidism and incident depressive symptoms (n=1311)

| Variables | OR (95%CI) | *P* | *P* for interaction |
| --- | --- | --- | --- |
|
| Gender |  |  |  |
| Male | 1.00 (0.00 ~ Inf) | 1.000 | 1.000 |
| Female | 1.96 (1.14 ~ 3.38) | 0.015 |
| Age |  |  |  |
| 18~29 | 0.00 (0.00 ~ Inf) | 0.995 | 0.222 |
| 30~34 | 1.31 (0.47 ~ 3.64) | 0.602 |
| 35~44 | 2.08 (0.98 ~ 4.43) | 0.057 |
| ≥45 | 5.21 (1.19 ~ 22.81) | 0.028 |
| Night shift work |  |  |  |
| No | 1.38 (0.46 ~ 4.16) | 0.569 | 0.451 |
| Yes | 2.25 (1.20 ~ 4.22) | 0.012 |
| Smoking status |  |  |  |
| No | 1.97 (1.15 ~ 3.40) | 0.014 | 1.000 |
| Yes | 1.00 (0.00 ~ Inf) | 1.000 |
| Alcohol use |  |  |  |
| No | 2.43 (1.28 ~ 4.63) | 0.007 | 0.261 |
| Yes | 1.19 (0.41 ~ 3.46) | 0.753 |
| Exercise frequency |  |  |  |
| None | 5.86 (1.96 ~ 17.50) | 0.002 | 0.055 |
| ≤1 time/week | 1.23 (0.58 ~ 2.60) | 0.591 |
| ≥2 times/week | 1.51 (0.36 ~ 6.26) | 0.570 |
| Sleep duration |  |  |  |
| ≤5h | 0.00 (0.00 ~ Inf) | 0.997 | 0.434 |
| 6h | 2.36 (1.00 ~ 5.58) | 0.049 |
| 7h | 1.36 (0.59 ~ 3.12) | 0.469 |
| 8h | 6.81 (1.44 ~ 32.19) | 0.015 |
| 9h | 1.00 (0.00 ~ Inf) | 1.000 |
| ≥10h | 1.00 (0.00 ~ Inf) | 1.000 |

Table A2. Subgroup analysis of the associations between endocrine/metabolic diseases and incident anxiety symptoms(n=1894)

| Variables | Exposure 1: hypothyroidism | | | Exposure 2: gastric/duodenal ulcer | | | Exposure 3: polycystic ovary syndrome | | |
| --- | --- | --- | --- | --- | --- | --- | --- | --- | --- |
| OR (95%CI) | *P* | *P* for interaction | OR (95%CI) | *P* | *P* for interaction | OR (95%CI) | *P* | *P* for interaction |
| Gender |  |  |  |  |  |  |  |  |  |
| Male | - | - | 0.531 | 0.76(0.08~7.01) | 0.809 | 0.427 | - | - | 0.470 |
| Female | 1.63(1.02~2.62) | 0.042 | 1.90(1.21~3.01) | 0.006 | 2.11(1.39~3.21) | <0.001 |
| Age |  |  |  |  |  |  |  |  |  |
| 18~29 | 0.00(0.00~Inf) | 0.985 | 0.434 | 0.00(0.00~Inf) | 0.986 | 0.110 | 1.63(0.57~4.69) | 0.362 | 0.837 |
| 30~34 | 1.69(0.69~4.12) | 0.247 | 2.50(1.13~5.53) | 0.024 | 1.88(0.90~3.91) | 0.091 |
| 35~44 | 1.52(0.80~2.88) | 0.197 | 2.18(1.12~4.26) | 0.022 | 2.33(1.28~4.26) | 0.006 |
| ≥45 | 2.50(0.73~8.61) | 0.146 | 1.44(0.50~4.15) | 0.496 | 5.37(0.33~87.91) | 0.238 |
| Night shift |  |  |  |  |  |  |  |  |  |
| No | 2.19(0.82~5.80) | 0.116 | 0.516 | 0.87(0.25~3.03) | 0.827 | 0.192 | 2.89(1.05~7.95) | 0.039 | 0.479 |
| Yes | 1.51(0.88~2.59) | 0.134 | 2.12(1.30~3.45) | 0.002 | 1.94(1.23~3.06) | 0.005 |
| Smoking status |  |  |  |  |  |  |  |  |  |
| No | 1.62(1.01~2.60) | 0.044 | 0.778 | 1.91(1.22~2.99) | 0.005 | 0.966 | 2.10(1.38~3.18) | <0.001 | 0.738 |
| Yes | - | - | 0.00(0.00~Inf) | 0.996 | - | - |
| Alcohol use |  |  |  |  |  |  |  |  |  |
| No | 1.54(0.88~2.67) | 0.130 | 0.722 | 1.93(1.14~3.28) | 0.015 | 0.718 | 2.07(1.30~3.31) | 0.002 | 0.989 |
| Yes | 1.86(0.76~4.56) | 0.175 | 1.61(0.70~3.69) | 0.260 | 2.09(0.84~5.18) | 0.113 |
| Exercise frequency |  |  |  |  |  |  |  |  |  |
| None | 3.64(1.75~7.58) | <0.001 | 0.010 | 2.06(1.01~4.21) | 0.048 | 0.939 | 1.31(0.70~2.45) | 0.406 | 0.133 |
| ≤1 time/week | 0.72(0.32~1.62) | 0.422 |  | 1.73(0.87~3.44) | 0.118 | 3.10(1.67~5.76) | <.001 |
| ≥2 times/week | 2.20(0.67~7.27) | 0.196 |  | 1.78(0.62~5.12) | 0.284 | 3.01(0.72~12.55) | 0.130 |
| Sleep duration |  |  |  |  |  |  |  |  |  |
| ≤5h | 0.62(0.07~5.53) | 0.669 | 0.198 | 1.93(0.52~7.13) | 0.321 | 0.836 | 1.65(0.39~7.04) | 0.500 | 0.208 |
| 6h | 1.59(0.80~3.19) | 0.187 | 1.53(0.84~2.80) | 0.168 | 3.14(1.71~5.75) | <0.001 |
| 7h | 1.28(0.58~2.86) | 0.542 | 2.26(0.96~5.32) | 0.062 | 1.88(0.91~3.85) | 0.087 |
| 8h | 6.40(1.60~25.63) | 0.009 | 1.41(0.16~12.55) | 0.759 | 0.52(0.06~4.12) | 0.533 |
| 9h | - | - | 0.00(0.00~Inf) | 0.996 | 0.00(0.00~Inf) | 0.996 |
| ≥10h | - | - | - | - | - | - |
